# Supplementary material for: Lipid peroxidation and the subsequent cell death transmitting from ferroptotic cells to neighboring cells
Source: PubMed Central journal article supplement (PMC8007748; doi:10.1038/s41419-021-03613-y), 2021-03-29
Supplement: 41419_2021_3613_MOESM3_ESM.pdf [file 41419_2021_3613_MOESM3_ESM.pdf]

**Supplementary Table S1. siRNA**

| siRNA     | Sequence                        |
|-----------|---------------------------------|
| siAtg7 #1 | 5'-CAAUGAUGUGGUGGCUCCAGGAGAU-3' |
| siAtg7 #2 | 5'-CAGCCUGGCAUUUGAUAAAUGUACA-3' |

**Supplementary Table S2. qPCR primers**

| Gene        | Forward primer               | Reverse primer             |
|-------------|------------------------------|----------------------------|
| <i>Actb</i> | 5'-CGTTGACATCCGTAAAGACCTC-3' | 5'-AGCCACCGATCCACACAGA-3'  |
| <i>Atg7</i> | 5'-TATGGACCCCAAAGGCTGG-3'    | 5'-AGCCACATTACACCCCAAGG-3' |
| <i>Glb1</i> | 5'-CGGATACCCCGCTTCTACTG-3'   | 5'-GGCACGTACATCTGGATAGC-3' |
